# Supplementary material for: Co-Design of an Educational Resource with Female Partners of Male Stroke Survivors to Support Physical Activity Participation
Source: Int J Environ Res Public Health. 2022 Dec 15;19(24):16856. doi: 10.3390/ijerph192416856 (PMC9779113; doi:10.3390/ijerph192416856)
Supplement: Supplementary file 1 [file ijerph-19-16856-s001.zip › Appendix S2 Coding template example.pdf]

## Appendix S2. Example of the coding template for Theme 3

### Theme 3. Considerations for successful stroke survivor physical activity participation

| Codes                                                                                                                        | Participants                  | Categories                                        | Descriptions                                                                                                                                                                                                                                                                                                                                                                  | Sub-theme                                   |
|------------------------------------------------------------------------------------------------------------------------------|-------------------------------|---------------------------------------------------|-------------------------------------------------------------------------------------------------------------------------------------------------------------------------------------------------------------------------------------------------------------------------------------------------------------------------------------------------------------------------------|---------------------------------------------|
| FP fitness                                                                                                                   | 7, 8, 11                      |                                                   |                                                                                                                                                                                                                                                                                                                                                                               |                                             |
| Improve FP's health                                                                                                          | 1, 2, 6, 8-10, 12, 13         | Benefits of PA for FP well-being                  |                                                                                                                                                                                                                                                                                                                                                                               |                                             |
| FP mental well-being                                                                                                         | 1, 2, 4, 6, 8, 12             |                                                   |                                                                                                                                                                                                                                                                                                                                                                               |                                             |
| FP physical well-being                                                                                                       | 1, 2, 4, 6, 7, 10, 11         |                                                   |                                                                                                                                                                                                                                                                                                                                                                               |                                             |
| SS FPiritual health                                                                                                          | 4, 13                         | Factors for successful participation in PA for SS |                                                                                                                                                                                                                                                                                                                                                                               |                                             |
| SS physical well-being                                                                                                       | 1, 4, 7, 13                   |                                                   |                                                                                                                                                                                                                                                                                                                                                                               |                                             |
| SS mental well-being                                                                                                         | 1, 4, 9, 13                   |                                                   |                                                                                                                                                                                                                                                                                                                                                                               |                                             |
| SS social health                                                                                                             | 4, 5, 10, 13                  |                                                   |                                                                                                                                                                                                                                                                                                                                                                               |                                             |
| FP tries to find a variety of activities as these are important to motivate SSs to be physically active                      | 2, 4, 6, 8                    | Variety                                           | The FPs understood that PA was beneficial for their own personal health and well-being so they could support the SSs needs. For successful participation in PA, the FPs identified that PA needs to incorporate a balance of physical, mental, social and FPiritual well-being. Activities should therefore be meaningful, enjoyable, participatory, and socially integrated. | A philosophy for PA                         |
| PA needs to be regular/routine                                                                                               | 2,4, 5, 9, 13, FGB2           | Routine                                           |                                                                                                                                                                                                                                                                                                                                                                               |                                             |
| PA needs to be social                                                                                                        | 1, 4, 5, FGA1FGB2, FGB3,      | Social integration                                |                                                                                                                                                                                                                                                                                                                                                                               |                                             |
| Going on outings that include PA                                                                                             | 5                             |                                                   |                                                                                                                                                                                                                                                                                                                                                                               |                                             |
| Social well-being important to SS recovery, morale, confidence, mental well-being                                            | 1, 3, 4, 8, FGA1, FGB2, FGB3  |                                                   |                                                                                                                                                                                                                                                                                                                                                                               |                                             |
| Social integration helps SS to think about others rather than dwell on impairments                                           | 4                             |                                                   |                                                                                                                                                                                                                                                                                                                                                                               |                                             |
| Male bonding is important post stroke                                                                                        | 8                             |                                                   |                                                                                                                                                                                                                                                                                                                                                                               |                                             |
| PA in a group of like-minded individuals is good for social integration and motivation                                       | 4, 8, 10, 13, FGB2            |                                                   |                                                                                                                                                                                                                                                                                                                                                                               |                                             |
| FP works out different ways to approach community outings                                                                    | FGA4                          |                                                   |                                                                                                                                                                                                                                                                                                                                                                               |                                             |
| PA needs to be enjoyable/pleasurable                                                                                         | 2, 4, 5, FGB2                 | Meaningful and enjoyable                          |                                                                                                                                                                                                                                                                                                                                                                               |                                             |
| PA needs to be meaningful to the SS                                                                                          | 4, 10, 12, FGA4, FGB2         |                                                   |                                                                                                                                                                                                                                                                                                                                                                               |                                             |
| PA need to be participatory and contribute to life roles and pre-stroke activities                                           | 1-5, 7, 10-12, FGA3, FGB3     | Participatory                                     |                                                                                                                                                                                                                                                                                                                                                                               |                                             |
| Creating competition is important                                                                                            | 5                             | Competitive                                       |                                                                                                                                                                                                                                                                                                                                                                               |                                             |
| PA needs to be challenging but target the SSs level of disability                                                            | 4, 6, 8                       | Challenging                                       |                                                                                                                                                                                                                                                                                                                                                                               |                                             |
| Stroke related impairments (fatigue, physical impairments, communication) affects participation in physical activity         | 2, 3, 4, 6, 9-12, FGA3, FGA4, | Stroke related impairments                        | The FPs considered the impact of their SS's physiological and psychological impairments when encouraging physical activity. They worried about physical safety particularly when the SS had physical and/or cognitive impairments that prevented them                                                                                                                         | Consideration of the SS and the environment |
| Mental well-being (fear of falling, frustration, motivation, self-drive, depression) affects engagement in physical activity | 1, 2, 4, 6, 8-10, 12, FGB3    | Mental well-being                                 |                                                                                                                                                                                                                                                                                                                                                                               |                                             |
| FPs develop a pragmatic approach to managing SS mental well-being (e.g., suicidal thoughts)                                  | FGB3                          |                                                   |                                                                                                                                                                                                                                                                                                                                                                               |                                             |
| FP warned about SS becoming depressed so encouraged pre-stroke activities post stroke                                        | 8                             |                                                   |                                                                                                                                                                                                                                                                                                                                                                               |                                             |

| Codes                                                                                                                           | Participants                      | Categories                              | Descriptions                                                                                                                                                                                                                                                                     | Sub-theme                       |
|---------------------------------------------------------------------------------------------------------------------------------|-----------------------------------|-----------------------------------------|----------------------------------------------------------------------------------------------------------------------------------------------------------------------------------------------------------------------------------------------------------------------------------|---------------------------------|
| FP learns to read SS mood so understands when to leave him be                                                                   | 4                                 |                                         | from making independent decisions                                                                                                                                                                                                                                                |                                 |
| FP needs to consider how the SS is feeling                                                                                      | FGA3, FGB3                        |                                         | or in being able to negotiate a                                                                                                                                                                                                                                                  |                                 |
| Other medical issues (e.g., side effects of medications, pre-existing conditions) affect ability to be physically active        | 6, 8, 9                           | Co-morbidities                          | challenging environment independently. Therefore, the built                                                                                                                                                                                                                      |                                 |
| Facilities that are a long way from home are challenging to access                                                              | 8, 13                             |                                         | environment required careful                                                                                                                                                                                                                                                     |                                 |
| PA is challenging when the built environment is inaccessible                                                                    | 4, 6, 9, 10, 13 FGA2, FGA3, FGB2  |                                         | scrutiny to ensure it was accessible                                                                                                                                                                                                                                             |                                 |
| Built environment access can be a barrier to social integration                                                                 | FGA3                              |                                         | and safe for the SS to use.                                                                                                                                                                                                                                                      |                                 |
| Gyms that are accessible for people with disabilities are needed                                                                | 4, 13                             | Built environment accessibility         |                                                                                                                                                                                                                                                                                  |                                 |
| Accessible built environment takes the stress out of the outing                                                                 | FGA1                              |                                         |                                                                                                                                                                                                                                                                                  |                                 |
| FP problem solves herself to try and make access easier                                                                         | 6                                 |                                         |                                                                                                                                                                                                                                                                                  |                                 |
| FP needs to check built environment prior to going on an outing with SS                                                         | 4, 9, FGA1, FGA2, FGB2            |                                         |                                                                                                                                                                                                                                                                                  |                                 |
| FP problem to accommodate SS impairments within changing environments for safety                                                | 4, FGB2                           |                                         |                                                                                                                                                                                                                                                                                  |                                 |
| Safety is paramount when making PA participatory                                                                                | 4, FGB2                           |                                         |                                                                                                                                                                                                                                                                                  |                                 |
| FP things about, worries about, and advises about safety                                                                        | 3, 5, 8, FGA3, FGA2               | Safety considerations                   |                                                                                                                                                                                                                                                                                  |                                 |
| FP recognises that SSs sometimes don't recognise their limitations (e.g., due to cognitive impairment) which is a safety issue  | 3, 10, FGA2                       |                                         |                                                                                                                                                                                                                                                                                  |                                 |
| FP finds it challenging to manage safety                                                                                        | FGA2                              |                                         |                                                                                                                                                                                                                                                                                  |                                 |
| FP needs to trust SS in calculated risk-taking behaviour                                                                        | FGB2                              |                                         |                                                                                                                                                                                                                                                                                  |                                 |
| FP forces SS to make decisions to take back control of their lives                                                              | 6                                 |                                         |                                                                                                                                                                                                                                                                                  |                                 |
| FP forces/challenges/encourages SS to participate in PA and life roles                                                          | 3- 6, 8, 10, 13, FGA1, FGA2, FGB2 |                                         |                                                                                                                                                                                                                                                                                  |                                 |
| Tough love important to drive motivation for physical activity                                                                  | 1, 4, 12                          |                                         |                                                                                                                                                                                                                                                                                  |                                 |
| FP acts as SS conscience for PA by prompting                                                                                    | 3, 9, 13                          | Nagging vs nurturing                    |                                                                                                                                                                                                                                                                                  |                                 |
| FP recognises that she can only do so much – it's up to the SS in the end                                                       | 1, FGB3                           |                                         |                                                                                                                                                                                                                                                                                  |                                 |
| How much can the FP push the SS to be physically active – need to find the balance                                              | 1, 12                             |                                         |                                                                                                                                                                                                                                                                                  |                                 |
| SS likely to say no to primary FP but pay more attention to others (e.g., family members)                                       | FGA3, FGB3                        |                                         | The FPs recognised that participation in PA for their SSs was more fruitful if they provided external motivation and encouragement. They also acknowledged that other people (e.g., family members and friends) were also helpful in encouraging participation in PA for the SS. |                                 |
| FP needs to be stubborn and not give in to SS otherwise goals are not achieved                                                  | 9, 10, FGB3                       |                                         |                                                                                                                                                                                                                                                                                  |                                 |
| FP provides encouragement, support, and praise for challenging/non-routine tasks                                                | 8-12                              | Praise and encouragement                |                                                                                                                                                                                                                                                                                  | External motivation and support |
| FP recognises that although SSs are adults, they reFPond better when treated like children (i.e., reward system for motivation) | FGB3                              | Provide rewards                         |                                                                                                                                                                                                                                                                                  |                                 |
| Family members and friends                                                                                                      | 3, 4, 6, 8, 9, 11,12, FGA3, FGA4  | Family members, friends, and neighbours |                                                                                                                                                                                                                                                                                  |                                 |
| Neighbours                                                                                                                      | 8                                 |                                         |                                                                                                                                                                                                                                                                                  |                                 |
| Members of community groups (e.g., church)                                                                                      | 1                                 |                                         |                                                                                                                                                                                                                                                                                  |                                 |
| Work colleagues                                                                                                                 | 4, 8                              | Work colleagues                         |                                                                                                                                                                                                                                                                                  |                                 |
| Health professionals                                                                                                            | 4, 6-8, 10, 11, 13, FGA2          | Health professionals                    |                                                                                                                                                                                                                                                                                  |                                 |

| Codes                                                                                             | Participants                       | Categories                  | Descriptions | Sub-theme |
|---------------------------------------------------------------------------------------------------|------------------------------------|-----------------------------|--------------|-----------|
| Gym staff                                                                                         | 8                                  |                             |              |           |
| Other FPs in the community is a great way to share problems                                       | 3, 6, 8, 9, FGA1, FGA4, FGB1, FGB2 | Members of stroke community |              |           |
| Other SSs                                                                                         | 10, FGB2                           |                             |              |           |
| Recognition from FP not to burden your support networks as they too have stressors in their lives | 9, FGB2                            | Care with overburdening     |              |           |

Abbreviations: Female partner (FP), focus group (FG), physical activity (PA), stroke survivor (SS)
